# Supplementary material
Source: MDPI journal article supplement (https://www.mdpi.com/2072-4292/6/3/1783)
Supplement: s1 [file s1]

## Article

**Spatio-Temporal Patterns and Climate Variables Controlling of Biomass Carbon Stock of Global Grassland Ecosystems from 1982 to 2006. *Remote Sensing* 2014, 6, 1783-1802****Jiangzhou Xia <sup>1,2</sup>, Shuguang Liu <sup>3,4,\*</sup>, Shunlin Liang <sup>1,2,5</sup>, Yang Chen <sup>6</sup>, Wenfang Xu <sup>6</sup> and Wenping Yuan <sup>6,7,\*</sup>**

<sup>1</sup> State Key Laboratory of Remote Sensing Science, Jointly Sponsored by Beijing Normal University and Institute of Remote Sensing and Digital Earth, Chinese Academy of Sciences, Beijing 100875, China; E-Mails: xiajiangzhou@mail.bnu.edu.cn (J.X.); sliang@umd.edu (S.L.)

<sup>2</sup> College of Global Change and Earth System Science, Beijing Normal University, Beijing 100875, China

<sup>3</sup> US Geological Survey (USGS) Earth Resources Observation and Science (EROS) Center, Sioux Falls, SD 57198, USA

<sup>4</sup> Geographic Information Science Center of Excellence, South Dakota State University, Brookings, SD 57007, USA

<sup>5</sup> Department of Geographical Sciences, University of Maryland, College Park, MD 20742, USA

<sup>6</sup> State Key Laboratory of Earth Surface Processes and Resource Ecology, Beijing Normal University, Beijing 100875, China; E-Mails: chen0323@163.com (Y.C.); xuwenfangfang@163.com (W.X.); yuanwpcn@126.com (W.Y.)

<sup>7</sup> State Key Laboratory of Cryospheric Sciences, Cold and Arid Regions Environmental and Engineering Research Institute, Chinese Academy of Sciences, Lanzhou 730000, China

\* Authors to whom correspondence should be addressed; E-Mails: sliu@usgs.gov (S.L.); yuanwpcn@126.com (W.Y.); Tel.: +1-605-594-6168 (S.L.); +86-10-58807715 (W.Y.); Fax: +1-605-594-6529 (S.L.); +86-10-58803002 (W.Y.).

*Received: 28 December 2013; in revised form: 10 February 2014 / Accepted: 12 February 2014 /*

*Published: 26 February 2014*

---

This supplementary supports the main text as follows:

Figure S1. MODIS land cover map in 2006.

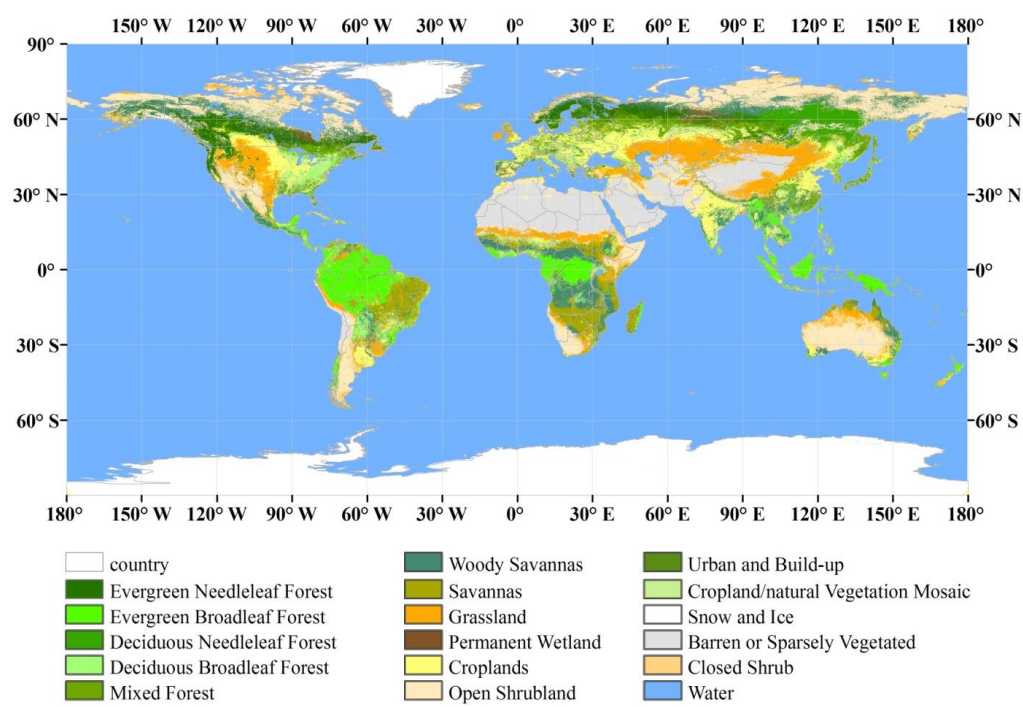

**Figure S2.** Spatial patterns of multiyear (1982–2006) mean annual precipitation (mm) in the five regions.

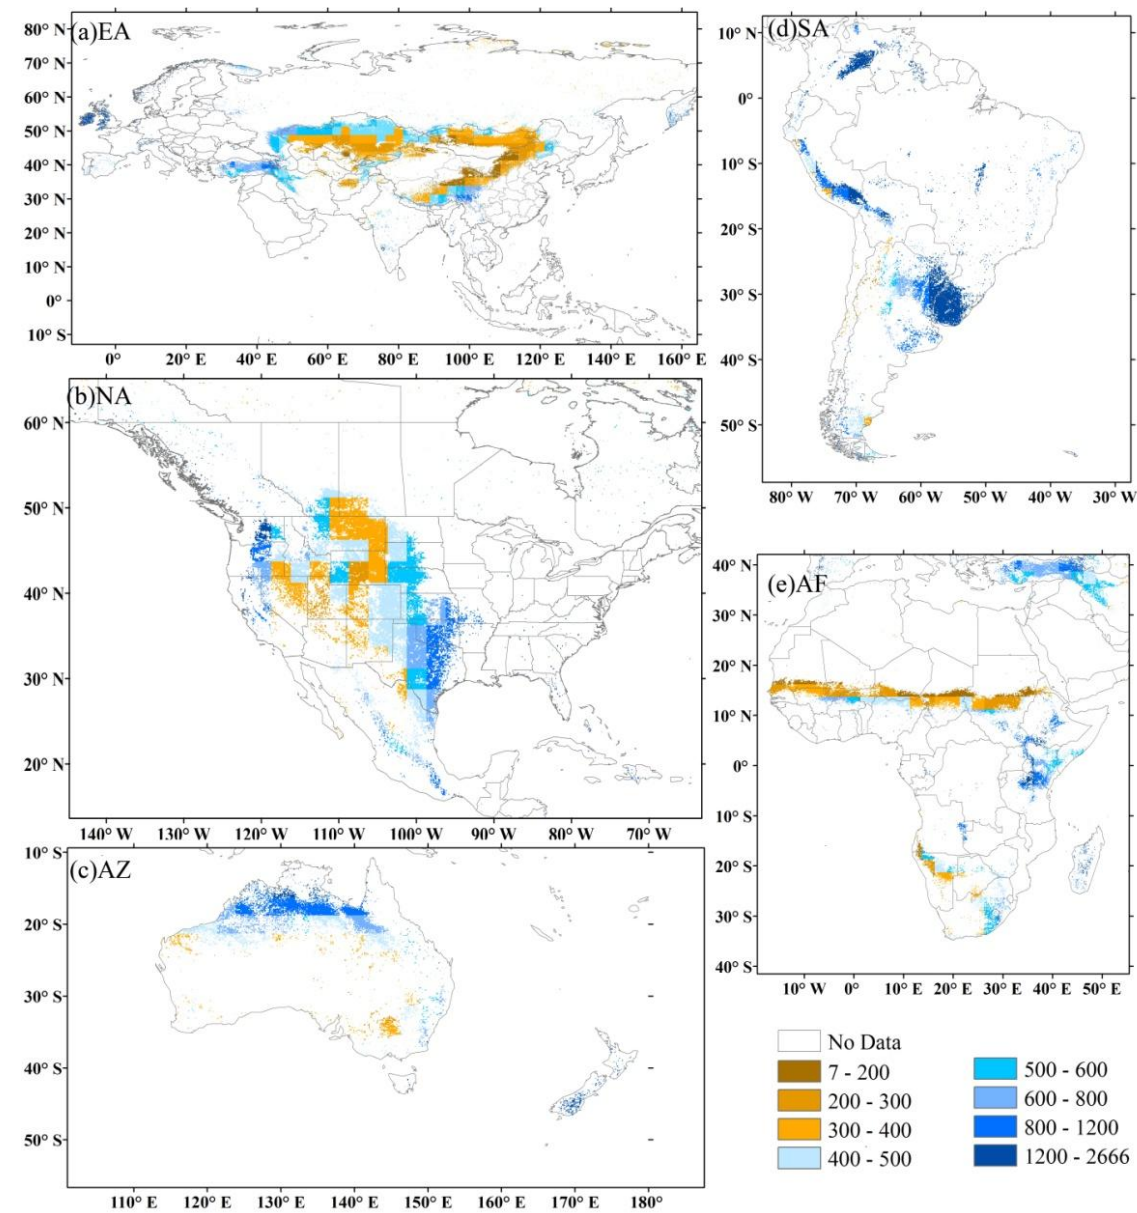

**Figure S3.** Coefficient of variance (CV, %) of aboveground live biomass carbon density in the five regions from 1982 to 2006 is determined by dividing the standard deviation by the mean of the simulated Agblive within each grid cell.

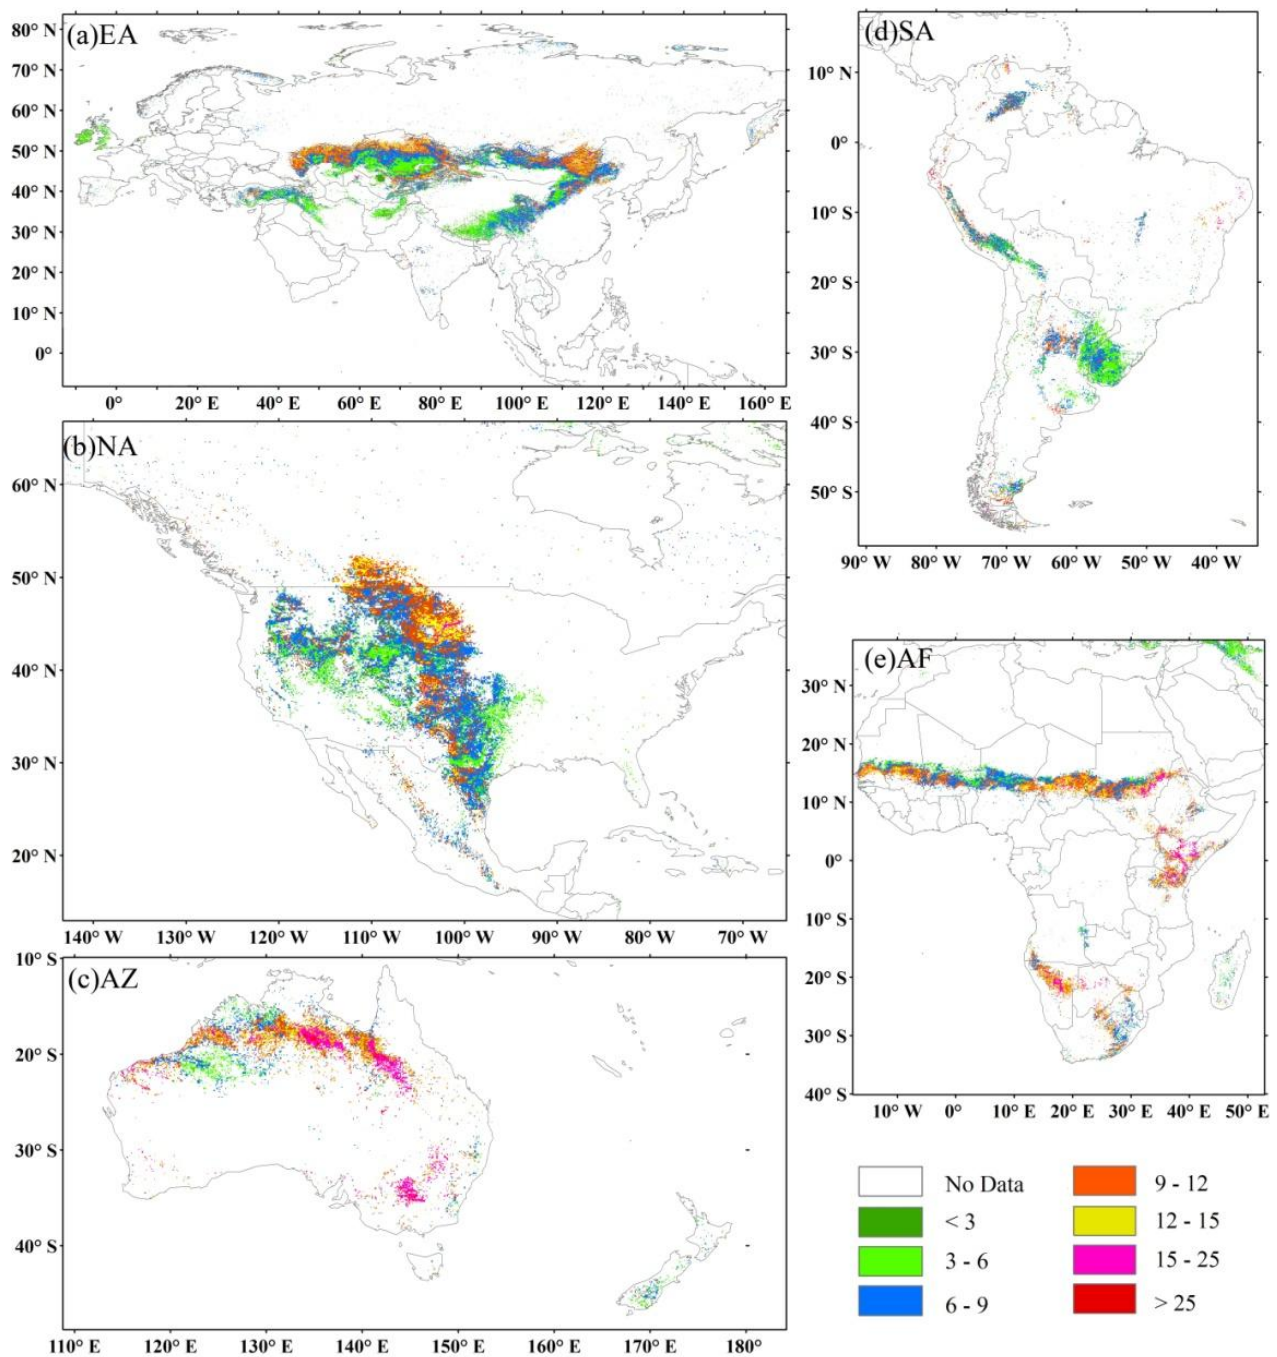

**Figure S4.** Spatial patterns of Pearson’s correlation coefficient of annual mean temperature and annual precipitation.

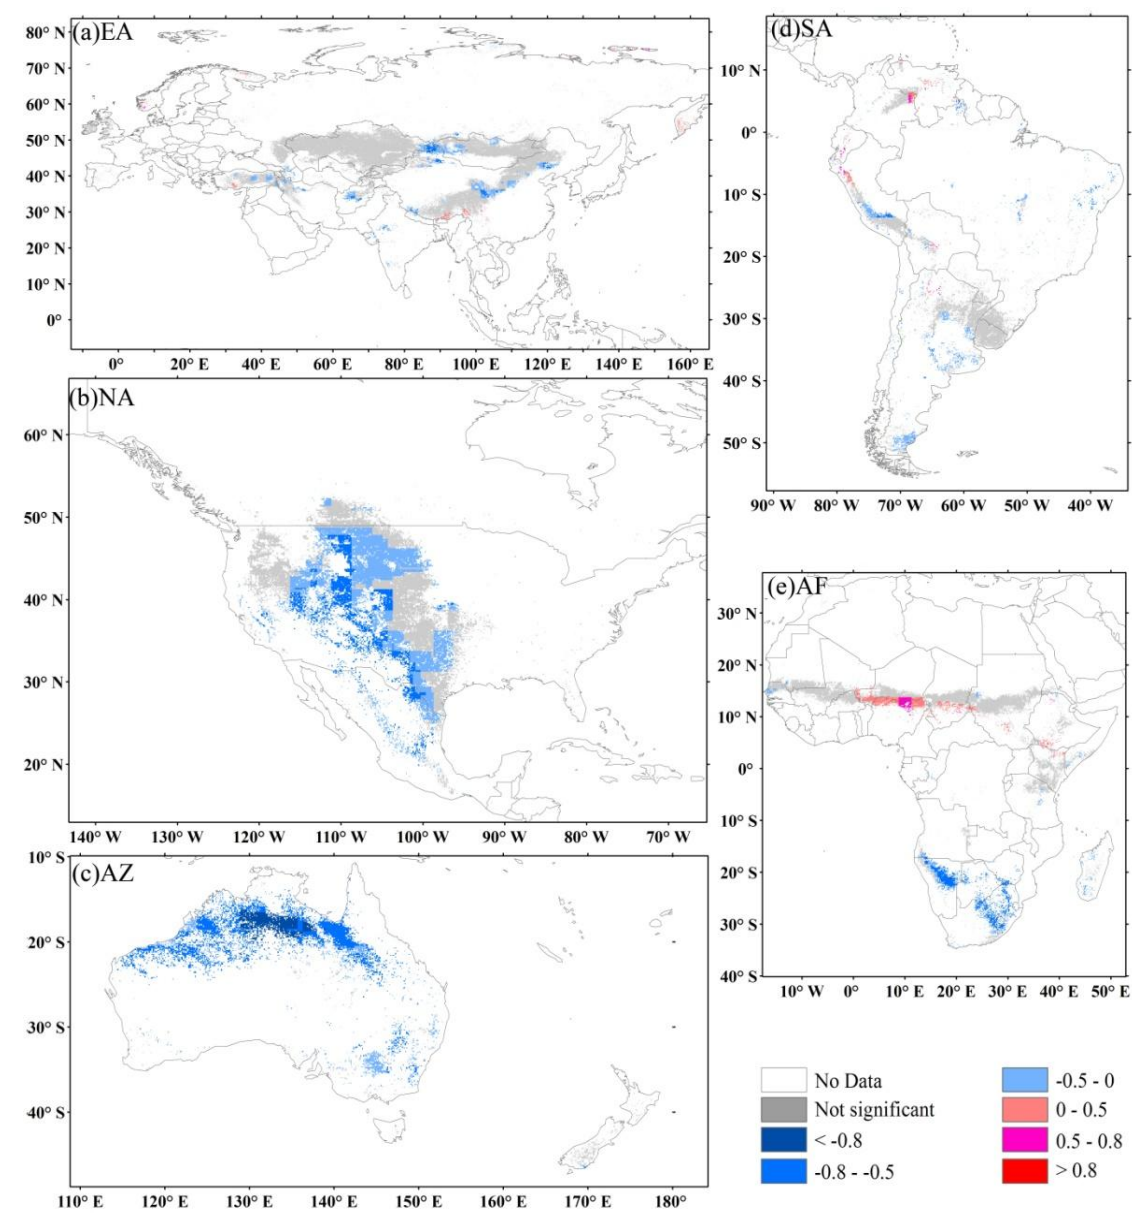



**Figure S5.** Interannual variations of Agbtc, temperature, and precipitation in grassland area of Africa (AF). Solid lines indicate linear fit during the period 1982–2006; dash-dot lines indicate linear fit during the period 1982–1994; dotted lines indicate linear fit during the period 1994–2006. Trends and their statistical significance (P value) are shown in the legend.

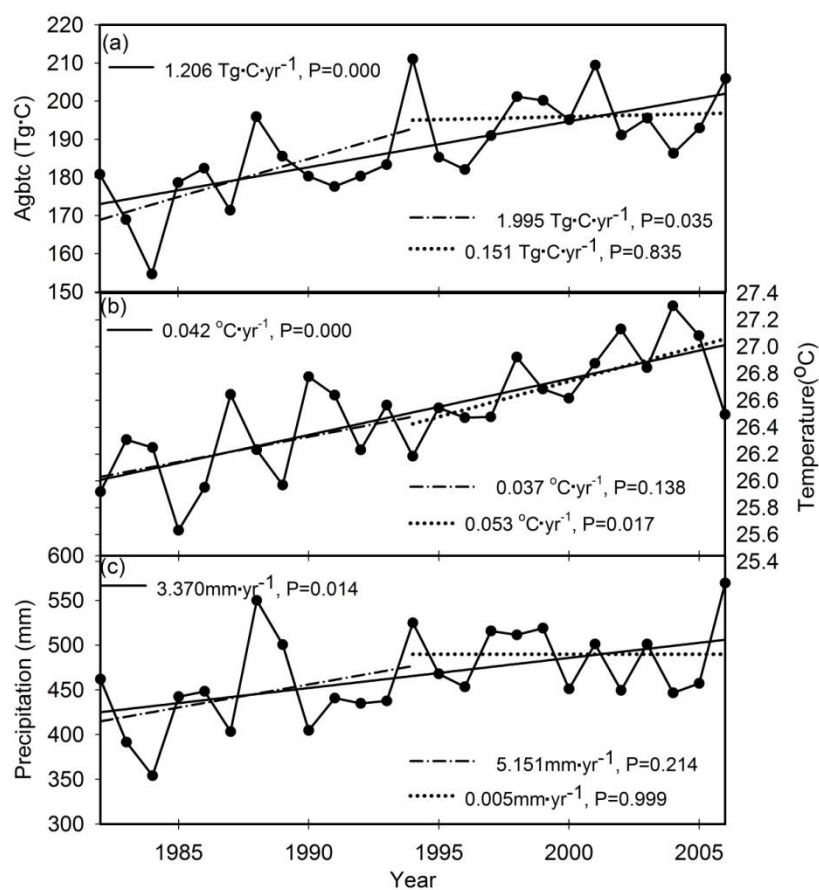

**Figure S6.** Interannual variations of Agbtc, temperature, and precipitation in grassland area of Europe and Asia (EA). Solid lines indicate linear fit during the period 1982–2006; dash-dot lines indicate linear fit during the period 1982–1994; dotted lines indicate linear fit during the period 1994–2006. Trends and their statistical significance (P value) are shown in the legend.

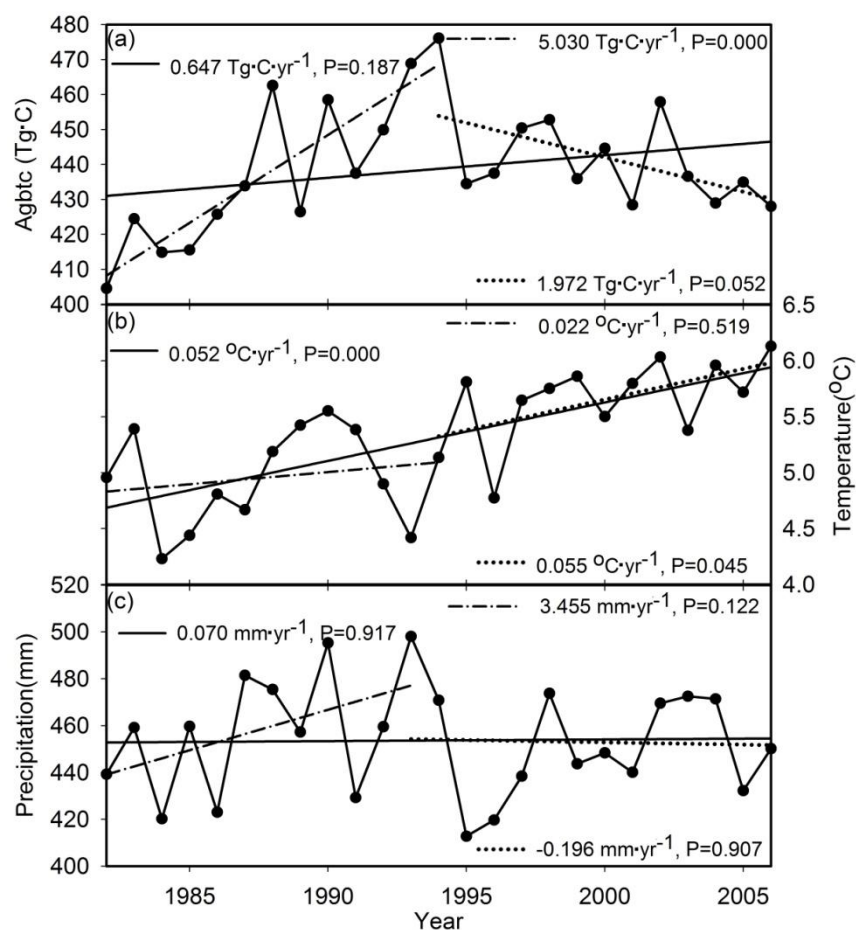

## References to Works Included in the Meta-Analysis

1. Abrams, M.D.; Knapp, A.K.; Hulbert, L.C. A ten-year record of aboveground biomass in a Kansas tallgrass prairie: Effects of fire and topographic position. *Am. J. Bot.* **1986**, *73*, 1509–1515.
2. Barrett, D.J.; Galbally, I.E.; Graetz, R.D. Quantifying uncertainty in estimates of C emissions from above-ground biomass due to historic land-use change to cropping in Australia. *Glob. Chang. Biol.* **2001**, *7*, 883–902.
3. Bessler, H.; Temperton, V.M.; Roscher, C.; Buchmann, N.; Schmid, B.; Schulze, E.-D.; Weisser, W.W.; Engels, C. Aboveground overyielding in grassland mixtures is associated with reduced biomass partitioning to belowground organs. *Ecology* **2009**, *90*, 1520–1530.
4. Boddy, E.; Hill, P.W.; Farrar, J.; Jones, D.L. Fast turnover of low molecular weight components of the dissolved organic carbon pool of temperate grassland field soils. *Soil Biol. Biochem.* **2007**, *39*, 827–835.
5. Bradley, B.A.; Houghton, R.A.; Mustard, J.F.; Hamburg, S.P. Invasive grass reduces aboveground carbon stocks in shrublands of the Western US. *Glob. Chang. Biol.* **2006**, *12*, 1815–1822.
6. Cheng, X.; An, S.; Chen, J.; Li, B.; Liu, Y.; Liu, S. Spatial relationships among species, above-ground biomass, N, and P in degraded grasslands in Ordos Plateau, northwestern China. *J. Arid Environ.* **2007**, *68*, 652–667.
7. Christie, E.K. Biomass and nutrient dynamics in a C<sub>4</sub> semi-arid Australian grassland community. *J. Appl. Ecol.* **1981**, *18*, 907–918.
8. Cox, J.R.; Ruyle, G.B.; Roundy, B.A. Lehmann lovegrass in southeastern Arizona: Biomass production and disappearance. *J. Range Manag.* **1990**, *43*, 367–372.
9. Frank, A.B.; Dugas, W.A. Carbon dioxide fluxes over a northern, semiarid, mixed-grass prairie. *Agric. For. Meteorol.* **2001**, *108*, 317–326.
10. Friedl, M.A.; Schimel, D.S.; Michaelsen, J.; Davis, F.W.; Walker, H. Estimating grassland biomass and leaf area index using ground and satellite data. *Int. J. Remote Sens.* **1994**, *15*, 1401–1420.
11. Hitz, C.; Egli, M.; Fitze, P. Below-ground and above-ground production of vegetational organic matter along a climosequence in alpine grasslands. *J. Plant Nutr. Soil Sci.* **2001**, *164*, 389–397.
12. Ingham, R.E.; Detling, J.K. Effects of root-feeding nematodes on aboveground net primary production in a North American grassland. *Plant Soil* **1990**, *121*, 279–281.
13. Lauenroth, W.K.; Whitman, W.C. Dynamics of dry matter production in a mixed-grass prairie in western North Dakota. *Oecologia* **1977**, *27*, 339–351.
14. Pérez, C.A.; Frangi, J.L. Grassland biomass dynamics along an altitudinal gradient in the Pampa. *J. Range Manag.* **2000**, 518–528.
15. Ram, J.; Singh, J.S.; Singh, S.P. Plant biomass, species diversity and net primary production in a central Himalayan high altitude grassland. *J. Ecol.* **1989**, 456–468.
16. Sala, O.; Deregibus, V.A.; Schlichter, T.; Alippe, H. Productivity dynamics of a native temperate grassland in Argentina. *J. Range Manag.* **1981**, *34*, 48–51.
17. Schuman, G.E.; Reeder, J.D.; Manley, J.T.; Hart, R.H.; Manley, W.A. Impact of grazing management on the carbon and nitrogen balance of a mixed-grass rangeland. *Ecol. Appl.* **1999**, *9*, 65–71.



18. Scurlock, J.M.O.; Johnson, K.; Olson, R.J. Estimating net primary productivity from grassland biomass dynamics measurements. *Glob. Chang. Biol.* **2002**, *8*, 736–753.
19. Sims, P.L.; Singh, J.S. The structure and function of ten western North American grasslands: II. intra-seasonal dynamics in primary producer compartments. *J. Ecol.* **1978**, *66*, 547–572.
20. Tilman, D.; Reich, P.B.; Knops, J.; Wedin, D.; Mielke, T.; Lehman, C. Diversity and productivity in a long-term grassland experiment. *Science* **2001**, *294*, 843–845.
21. Wessels, K.J.; Prince, S.D.; Zambatis, N.; MacFadyen, S.; Frost, P.E.; van Zyl, D. Relationship between herbaceous biomass and 1-km<sup>2</sup> Advanced Very High Resolution Radiometer (AVHRR) NDVI in Kruger National Park, South Africa. *Int. J. Remote Sens.* **2006**, *27*, 951–973.
22. Su, Y.-Z.; Li, Y.-L.; Cui, J.-Y.; Zhao, W.-Z. Influences of continuous grazing and livestock exclusion on soil properties in a degraded sandy grassland, Inner Mongolia, northern China. *Catena* **2005**, *59*, 267–278.
23. Liu, Z.Y.; Huang, J.F.; Wu, X.H.; Dong, Y.P.; Wang, F.M.; Liu, P.T. Hyperspectral remote sensing estimation models for the grassland biomass. *Trans. Chin. Soc. Agric. Eng.* **2006**, *22*, 111–115. (In Chinese)
24. Yang, Y.G. Investigation on the seasonal dynamic of grassland aboveground biomass, leaf area index and chlorophyll content. *Ecol. Domest. Anim.* **1997**, *18*, 6–11. (In Chinese)

© 2014 by the authors; licensee MDPI, Basel, Switzerland. This article is an open access article distributed under the terms and conditions of the Creative Commons Attribution license (<http://creativecommons.org/licenses/by/3.0/>).
